# Supplementary material for: Phagocytosis-associated genes in Acanthamoeba castellanii feeding on Escherichia coli
Source: PubMed Central journal article supplement — Parasites Hosts Dis. 2023 Nov 28;61(4):397–404. doi: 10.3347/PHD.23088 (PMC10693966; doi:10.3347/phd.23088), 2023-11-28
Supplement: PHD-23088-Supplementary-Table-S1.pdf [file PHD-23088-Supplementary-Table-S1.pdf]

**Supplementary Table S1.** Primer sequences for real time PCR

| No. | Gene symbol | Product                       | Primer sequences (5'→3') |                         |
|-----|-------------|-------------------------------|--------------------------|-------------------------|
| 1   | ACA1_077100 | Rab1/RabD family small GTPase | F: CAGGGCATTGTTCTCGTGTA  | R: CCGACGAGAAGCTTGACAAT |
| 2   | ACA1_175060 | Vacuolar proton ATPase        | F: CCCAACTTGCTCAACCTCAT  | R: TCAGGACCCACTGGAGGTAG |
| 3   | AFD36229.1  | Cysteine proteinase II        | F: CTTCGTGGAGGAGTTCAACC  | R: AGCATGTGGCCCTTGTAGAG |
